# Supplementary material for: Short-Term Exposure to Nitrogen Dioxide Modifies Genetic Predisposition in Blood Lipid and Fasting Plasma Glucose: A Pedigree-Based Study
Source: MDPI journal article supplement (doi:10.3390/biology12121470), 2023-11-27
Supplement: s1 [file s1]

## Supplemental Material

### Tables

**Table S1.** Percentage changes with 95% confidence intervals (95% CIs) in TG, TC, LDLC, HDLC and FPG associated with per 1  $\mu\text{g}/\text{m}^3$  increase in  $\text{NO}_2$  of different lag structures among population stratified by sex.

| Trait    | Lag structure | Sex    | Percentage changes<br>(95%CI) | P      | P for interaction |
|----------|---------------|--------|-------------------------------|--------|-------------------|
| TG       | Lag0          | Male   | 0.072(-0.951,1.106)           | 0.890  | 0.865             |
|          |               | Female | 0.050(-0.828,0.936)           | 0.911  |                   |
|          | Lag1          | Male   | 0.325(-0.815,1.478)           | 0.578  | 0.185             |
|          |               | Female | 0.964(-0.022,1.959)           | 0.056  |                   |
|          | Lag2          | Male   | 0.461(-0.796,1.735)           | 0.474  | 0.445             |
|          |               | Female | 1.081(-0.030,2.204)           | 0.057  |                   |
|          | Mv01          | Male   | 0.286(-1.163,1.756)           | 0.701  | 0.402             |
|          |               | Female | 0.177(-1.059,1.429)           | 0.780  |                   |
|          | Mv02          | Male   | 1.215(-0.863,3.337)           | 0.254  | 0.428             |
|          |               | Female | 0.125(-1.606,1.886)           | 0.889  |                   |
| TC       | Lag0          | Male   | 0.143(-0.114,0.401)           | 0.276  | 0.556             |
|          |               | Female | 0.275(-0.182,0.734)           | 0.239  |                   |
|          | Lag1          | Male   | 0.019(-0.250,0.288)           | 0.892  | 0.368             |
|          |               | Female | 0.318(-0.179,0.817)           | 0.210  |                   |
|          | Lag2          | Male   | 0.035(-0.273,0.344)           | 0.822  | 0.203             |
|          |               | Female | 0.455(-0.114,1.027)           | 0.118  |                   |
|          | Mv01          | Male   | 0.147(-0.215,0.510)           | 0.427  | 0.488             |
|          |               | Female | 0.222(-0.417,0.865)           | 0.496  |                   |
|          | Mv02          | Male   | 0.188(-0.333,0.711)           | 0.481  | 0.363             |
|          |               | Female | 0.385(-0.528,1.306)           | 0.411  |                   |
| LDLC     | Lag0          | Male   | 0.229(-0.074,0.533)           | 0.139  | 0.828             |
|          |               | Female | 0.243(-0.014,0.501)           | 0.064  |                   |
|          | Lag1          | Male   | 0.079(-0.243,0.403)           | 0.630  | 0.573             |
|          |               | Female | 0.226(-0.043,0.496)           | 0.100  |                   |
|          | Lag2          | Male   | 0.251(-0.113,0.617)           | 0.177  | 0.728             |
|          |               | Female | 0.194(-0.119,0.509)           | 0.226  |                   |
|          | Mv01          | Male   | 0.198(-0.230,0.627)           | 0.366  | 0.626             |
|          |               | Female | 0.081(-0.275,0.438)           | 0.656  |                   |
|          | Mv02          | Male   | 0.014(-0.605,0.636)           | 0.966  | 0.638             |
|          |               | Female | 0.036(-0.474,0.549)           | 0.890  |                   |
| HDL<br>C | Lag0          | Male   | -2.166(-2.851,-1.475)         | <0.001 | 0.122             |
|          |               | Female | -1.690(-2.122,-1.257)         | <0.001 |                   |
|          | Lag1          | Male   | -0.608(-1.294,0.083)          | 0.085  | 0.012             |

|     |      |        |                       |        |       |
|-----|------|--------|-----------------------|--------|-------|
|     |      | Female | -1.083(-1.540,-0.623) | <0.001 |       |
|     | Lag2 | Male   | -0.602(-1.332,0.134)  | 0.109  | 0.226 |
|     |      | Female | -0.412(-0.873,0.052)  | 0.082  |       |
|     | Mv01 | Male   | -2.046(-2.945,-1.139) | <0.001 | 0.033 |
|     |      | Female | -1.881(-2.445,-1.314) | <0.001 |       |
|     | Mv02 | Male   | -2.109(-3.395,-0.805) | 0.002  | 0.056 |
|     |      | Female | -1.318(-2.092,-0.538) | <0.001 |       |
| GLU | Lag0 | Male   | -0.298(-0.621,0.026)  | 0.072  | 0.145 |
|     |      | Female | -0.054(-0.266,0.158)  | 0.618  |       |
|     | Lag1 | Male   | -0.092(-0.417,0.235)  | 0.582  | 0.296 |
|     |      | Female | 0.236(0.021,0.452)    | 0.032  |       |
|     | Lag2 | Male   | 0.080(-0.298,0.460)   | 0.679  | 0.813 |
|     |      | Female | 0.116(-0.147,0.380)   | 0.387  |       |
|     | Mv01 | Male   | -0.408(-0.856,0.042)  | 0.076  | 0.216 |
|     |      | Female | 0.141(-0.150,0.432)   | 0.344  |       |
|     | Mv02 | Male   | -0.515(-1.153,0.127)  | 0.116  | 0.458 |
|     |      | Female | 0.196(-0.222,0.616)   | 0.358  |       |

HDLC, high-density lipoprotein cholesterol; Lag0, concentrations of the day of investigation; Lag1, concentrations of the previous day of investigation; Lag2, concentrations of the two days before the investigation; LDLC, low-density lipoprotein cholesterol, Mv01, moving average concentrations of Lag0 and Lag1; Mv02, moving average concentrations of Lag0 to Lag2; TC, total cholesterol; TG, triglycerides.

Multivariable model was adjusted for age, sex, BMI, education level, family ID as random effect term, physical activity, smoking, drinking, vegetable and fruit intake, the whole grain intake, meat intake, tea intake, use of antihypertensive/antidiabetic/antihyperlipidemic drug, and concentration of PM<sub>2.5</sub>, PM<sub>10</sub>, CO and O<sub>3</sub>.

**Table S2.** Percentage changes with 95% confidence intervals (95% CIs) in TG, TC, LDLC, HDLC and FPG associated with per 1  $\mu\text{g}/\text{m}^3$  increase in  $\text{NO}_2$  of different lag structures among population stratified by age group.

| Trait | Lag structure | Age       | Percentage changes (95%CI) | P      | P for interaction |
|-------|---------------|-----------|----------------------------|--------|-------------------|
| TG    | Lag0          | <60       | 0.194(-0.725,1.123)        | 0.680  | 0.112             |
|       |               | $\geq 60$ | 0.182(-0.774,1.146)        | 0.711  |                   |
|       | Lag1          | <60       | 0.054(-0.902,1.019)        | 0.913  | 0.028             |
|       |               | $\geq 60$ | 1.578(0.418,2.751)         | 0.008  |                   |
|       | Lag2          | <60       | 0.427(-0.700,1.566)        | 0.460  | 0.079             |
|       |               | $\geq 60$ | 1.391(0.133,2.665)         | 0.030  |                   |
|       | Mv01          | <60       | 0.554(-0.670,1.794)        | 0.377  | 0.052             |
|       |               | $\geq 60$ | 0.034(-1.419,1.508)        | 0.964  |                   |
|       | Mv02          | <60       | 1.744(-0.075,3.597)        | 0.061  | 0.073             |
|       |               | $\geq 60$ | 0.174(-1.856,2.247)        | 0.868  |                   |
| TC    | Lag0          | <60       | 0.086(-0.156,0.330)        | 0.486  | 0.527             |
|       |               | $\geq 60$ | 0.346(-0.190,0.885)        | 0.207  |                   |
|       | Lag1          | <60       | 0.164(-0.084,0.413)        | 0.194  | 0.718             |
|       |               | $\geq 60$ | 0.249(-0.347,0.848)        | 0.414  |                   |
|       | Lag2          | <60       | 0.038(-0.256,0.333)        | 0.799  | 0.629             |
|       |               | $\geq 60$ | 0.333(-0.337,1.008)        | 0.331  |                   |
|       | Mv01          | <60       | 0.017(-0.304,0.339)        | 0.917  | 0.566             |
|       |               | $\geq 60$ | 0.297(-0.502,1.102)        | 0.468  |                   |
|       | Mv02          | <60       | 0.348(-0.119,0.816)        | 0.145  | 0.526             |
|       |               | $\geq 60$ | 0.156(-0.967,1.292)        | 0.786  |                   |
| LDLC  | Lag0          | <60       | 0.388(0.110,0.668)         | 0.006  | 0.727             |
|       |               | $\geq 60$ | 0.125(-0.153,0.404)        | 0.377  |                   |
|       | Lag1          | <60       | 0.304(0.020,0.588)         | 0.036  | 0.754             |
|       |               | $\geq 60$ | 0.039(-0.266,0.345)        | 0.802  |                   |
|       | Lag2          | <60       | 0.281(-0.054,0.616)        | 0.100  | 0.900             |
|       |               | $\geq 60$ | 0.121(-0.225,0.467)        | 0.494  |                   |
|       | Mv01          | <60       | 0.095(-0.274,0.466)        | 0.614  | 0.698             |
|       |               | $\geq 60$ | 0.180(-0.230,0.592)        | 0.390  |                   |
|       | Mv02          | <60       | 0.026(-0.516,0.572)        | 0.924  | 0.786             |
|       |               | $\geq 60$ | 0.118(-0.463,0.702)        | 0.691  |                   |
| HDLc  | Lag0          | <60       | -1.835(-2.293,-1.375)      | <0.001 | 0.581             |
|       |               | $\geq 60$ | -2.073(-2.712,-1.429)      | <0.001 |                   |
|       | Lag1          | <60       | -1.286(-1.781,-0.788)      | <0.001 | 0.261             |
|       |               | $\geq 60$ | -0.426(-1.072,0.223)       | 0.198  |                   |
|       | Lag2          | <60       | -0.478(-0.959,0.006)       | 0.053  | 0.614             |
|       |               | $\geq 60$ | -0.644(-1.331,0.048)       | 0.068  |                   |
|       | Mv01          | <60       | -2.158(-2.760,-1.553)      | <0.001 | 0.418             |
|       |               | $\geq 60$ | -1.772(-2.616,-0.920)      | <0.001 |                   |
|       | Mv02          | <60       | -1.561(-2.392,-0.723)      | <0.001 | 0.363             |
|       |               | $\geq 60$ | -1.742(-2.921,-0.548)      | 0.004  |                   |

|     |      |      |                       |       |       |
|-----|------|------|-----------------------|-------|-------|
| GLU | Lag0 | <60  | -0.247(-0.486,-0.007) | 0.044 | 0.533 |
|     |      | >=60 | -0.113(-0.406,0.180)  | 0.448 |       |
|     | Lag1 | <60  | -0.034(-0.267,0.199)  | 0.776 | 0.866 |
|     |      | >=60 | 0.285(-0.019,0.591)   | 0.067 |       |
|     | Lag2 | <60  | 0.169(-0.120,0.459)   | 0.252 | 0.688 |
|     |      | >=60 | -0.033(-0.386,0.321)  | 0.854 |       |
|     | Mv01 | <60  | -0.297(-0.616,0.022)  | 0.068 | 0.665 |
|     |      | >=60 | 0.140(-0.279,0.560)   | 0.513 |       |
|     | Mv02 | <60  | -0.378(-0.844,0.089)  | 0.113 | 0.640 |
|     |      | >=60 | 0.144(-0.441,0.733)   | 0.630 |       |

HDLC, high-density lipoprotein cholesterol; Lag0, concentrations of the day of investigation; Lag1, concentrations of the previous day of investigation; Lag2, concentrations of the two days before the investigation; LDLC, low-density lipoprotein cholesterol, Mv01, moving average concentrations of Lag0 and Lag1; Mv02, moving average concentrations of Lag0 to Lag2; TC, total cholesterol; TG, triglycerides.

Multivariable model was adjusted for age, sex, BMI, education level, family ID as random effect term, physical activity, smoking, drinking, vegetable and fruit intake, the whole grain intake, meat intake, tea intake, use of antihypertensive/antidiabetic/antihyperlipidemic drug, and concentration of PM<sub>2.5</sub>, PM<sub>10</sub>, CO and O<sub>3</sub>.

**Table S3.** Percentage changes with 95% confidence intervals (95% CIs) in TG, TC, LDLC, HDLC and FPG associated with per 1  $\mu\text{g}/\text{m}^3$  increase in  $\text{NO}_2$  of different lag structures among population stratified by BMI.

| Trait | Lag structure | BMI       | Percentage changes (95%CI) | P      | P for interaction |
|-------|---------------|-----------|----------------------------|--------|-------------------|
| TG    | Lag0          | <24       | 0.783(-0.163,1.737)        | 0.105  | 0.957             |
|       |               | $\geq 24$ | 0.616(-0.373,1.614)        | 0.224  |                   |
|       | Lag1          | <24       | 1.754(0.475,3.048)         | 0.007  | 0.147             |
|       |               | $\geq 24$ | 0.145(-0.827,1.126)        | 0.771  |                   |
|       | Lag2          | <24       | 1.999(0.787,3.226)         | 0.001  | 0.770             |
|       |               | $\geq 24$ | 0.079(-1.124,1.297)        | 0.898  |                   |
|       | Mv01          | <24       | 0.829(-0.620,2.299)        | 0.264  | 0.476             |
|       |               | $\geq 24$ | 0.024(-1.271,1.337)        | 0.971  |                   |
|       | Mv02          | <24       | 0.255(-1.769,2.319)        | 0.807  | 0.665             |
|       |               | $\geq 24$ | 1.591(-0.286,3.504)        | 0.098  |                   |
| TC    | Lag0          | <24       | 0.273(-0.180,0.727)        | 0.238  | 0.507             |
|       |               | $\geq 24$ | 0.279(0.024,0.536)         | 0.033  |                   |
|       | Lag1          | <24       | 0.310(-0.175,0.798)        | 0.211  | 0.587             |
|       |               | $\geq 24$ | 0.005(-0.262,0.272)        | 0.972  |                   |
|       | Lag2          | <24       | 0.384(-0.162,0.934)        | 0.169  | 0.636             |
|       |               | $\geq 24$ | 0.030(-0.283,0.344)        | 0.850  |                   |
|       | Mv01          | <24       | 0.160(-0.479,0.803)        | 0.624  | 0.592             |
|       |               | $\geq 24$ | 0.271(-0.079,0.623)        | 0.129  |                   |
|       | Mv02          | <24       | 0.239(-0.661,1.146)        | 0.604  | 0.607             |
|       |               | $\geq 24$ | 0.493(-0.022,1.010)        | 0.061  |                   |
| LDLC  | Lag0          | <24       | 0.202(-0.058,0.463)        | 0.129  | 0.756             |
|       |               | $\geq 24$ | 0.248(-0.056,0.553)        | 0.111  |                   |
|       | Lag1          | <24       | 0.211(-0.067,0.490)        | 0.138  | 0.815             |
|       |               | $\geq 24$ | 0.130(-0.187,0.447)        | 0.422  |                   |
|       | Lag2          | <24       | 0.120(-0.196,0.436)        | 0.458  | 0.359             |
|       |               | $\geq 24$ | 0.363(-0.002,0.731)        | 0.052  |                   |
|       | Mv01          | <24       | 0.076(-0.294,0.448)        | 0.687  | 0.722             |
|       |               | $\geq 24$ | 0.181(-0.234,0.599)        | 0.394  |                   |
|       | Mv02          | <24       | 0.028(-0.492,0.551)        | 0.917  | 0.533             |
|       |               | $\geq 24$ | 0.009(-0.606,0.627)        | 0.978  |                   |
| HDLC  | Lag0          | <24       | -2.216(-2.755,-1.674)      | <0.001 | 0.558             |
|       |               | $\geq 24$ | -1.153(-1.637,-0.667)      | <0.001 |                   |
|       | Lag1          | <24       | -1.118(-1.686,-0.547)      | <0.001 | 0.766             |
|       |               | $\geq 24$ | -0.414(-0.904,0.079)       | 0.100  |                   |
|       | Lag2          | <24       | -0.715(-1.278,-0.150)      | 0.013  | 0.706             |
|       |               | $\geq 24$ | 0.017(-0.520,0.557)        | 0.951  |                   |
|       | Mv01          | <24       | -2.253(-2.970,-1.532)      | <0.001 | 0.645             |
|       |               | $\geq 24$ | -1.162(-1.788,-0.532)      | <0.001 |                   |
|       | Mv02          | <24       | -2.103(-3.094,-1.101)      | <0.001 | 0.924             |
|       |               | $\geq 24$ | -0.406(-1.303,0.500)       | 0.379  |                   |

|     |      |      |                      |       |       |
|-----|------|------|----------------------|-------|-------|
| GLU | Lag0 | <24  | -0.212(-0.441,0.017) | 0.070 | 0.828 |
|     |      | >=24 | -0.125(-0.439,0.191) | 0.439 |       |
|     | Lag1 | <24  | 0.097(-0.138,0.333)  | 0.420 | 0.597 |
|     |      | >=24 | 0.021(-0.292,0.334)  | 0.896 |       |
|     | Lag2 | <24  | 0.048(-0.224,0.322)  | 0.729 | 0.515 |
|     |      | >=24 | 0.143(-0.240,0.528)  | 0.464 |       |
|     | Mv01 | <24  | -0.146(-0.469,0.178) | 0.377 | 0.779 |
|     |      | >=24 | -0.130(-0.553,0.293) | 0.546 |       |
|     | Mv02 | <24  | -0.247(-0.698,0.207) | 0.286 | 0.708 |
|     |      | >=24 | -0.093(-0.712,0.529) | 0.768 |       |

HDLC, high-density lipoprotein cholesterol; Lag0, concentrations of the day of investigation; Lag1, concentrations of the previous day of investigation; Lag2, concentrations of the two days before the investigation; LDLC, low-density lipoprotein cholesterol, Mv01, moving average concentrations of Lag0 and Lag1; Mv02, moving average concentrations of Lag0 to Lag2; TC, total cholesterol; TG, triglycerides.

Multivariable model was adjusted for age, sex, BMI, education level, family ID as random effect term, physical activity, smoking, drinking, vegetable and fruit intake, the whole grain intake, meat intake, tea intake, use of antihypertensive/antidiabetic/antihyperlipidemic drug, and concentration of PM<sub>2.5</sub>, PM<sub>10</sub>, CO and O<sub>3</sub>.

## Figures

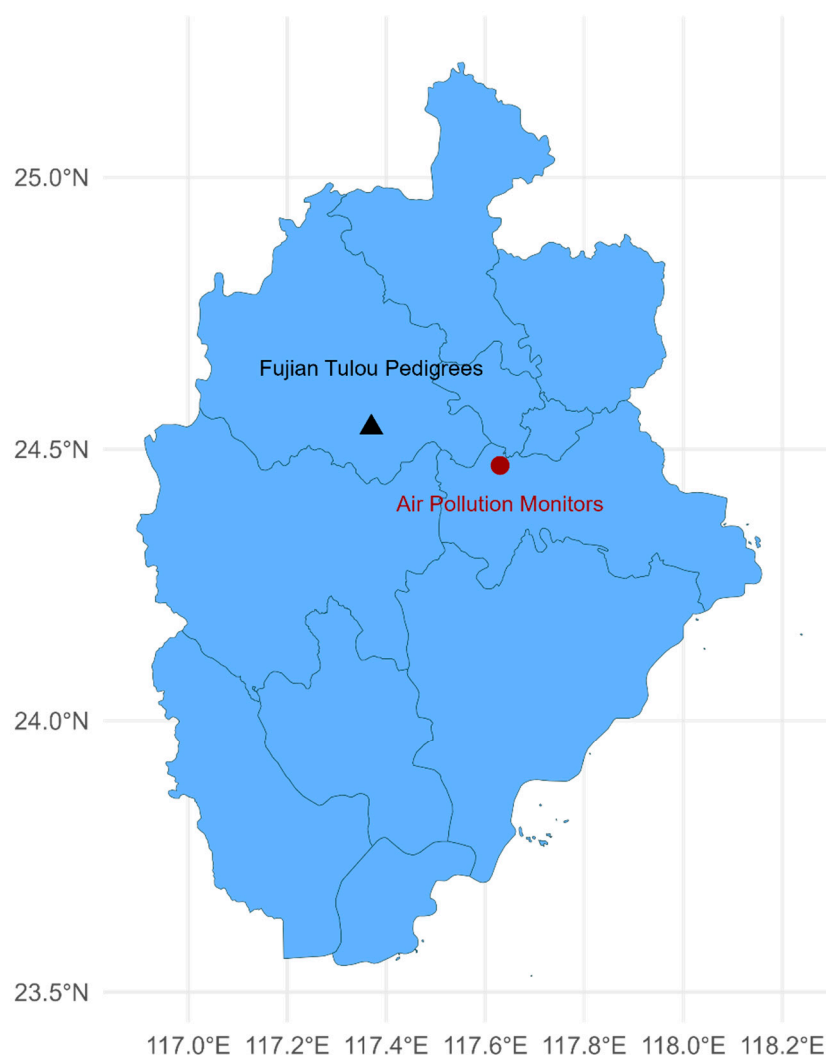

**Figure S1. Map of Fujian Tulou Pedigree-based Cohort study site and air pollutant monitor locations.** The black triangle represented the Fujian Pedigree-based Cohort site at 117.37°E, 24.54°N; the red dot represented the air pollutant monitors at 117.63°E, 24.47°N.

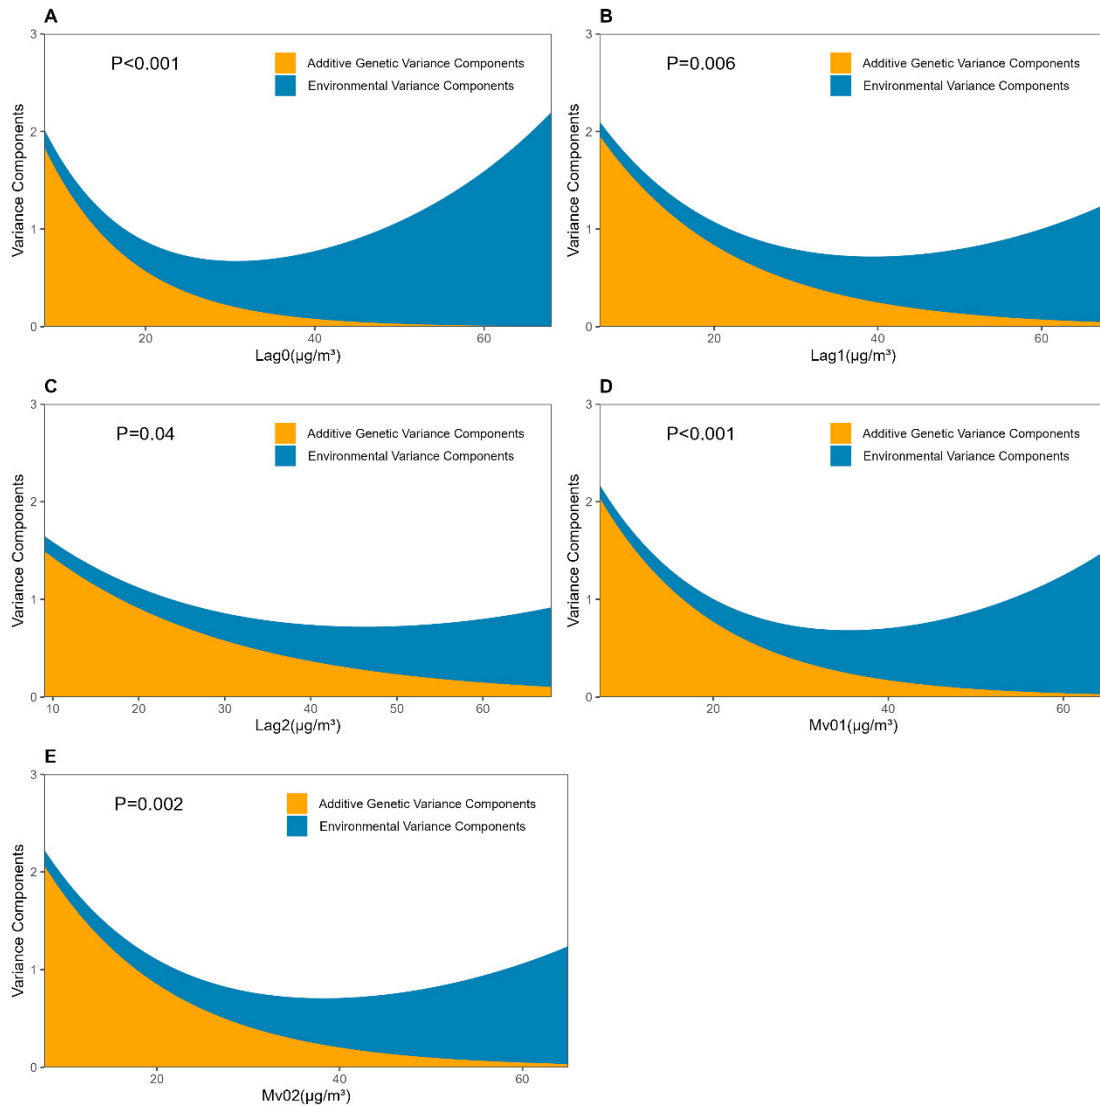

**Figure S2. Interactions of genotype by NO<sub>2</sub> on HDLC in different lag structures.** In all lag structures, environmental effects on HDLC increased with increasing NO<sub>2</sub> concentrations, while genetic effects diminished gradually. Lag0, concentrations of the day of investigation; Lag1, concentrations of the previous day of investigation; Lag2, concentrations of the two days before the investigation; Mv01, moving average concentrations of Lag0 and Lag1; Mv02, moving average concentrations of Lag0 to Lag2.



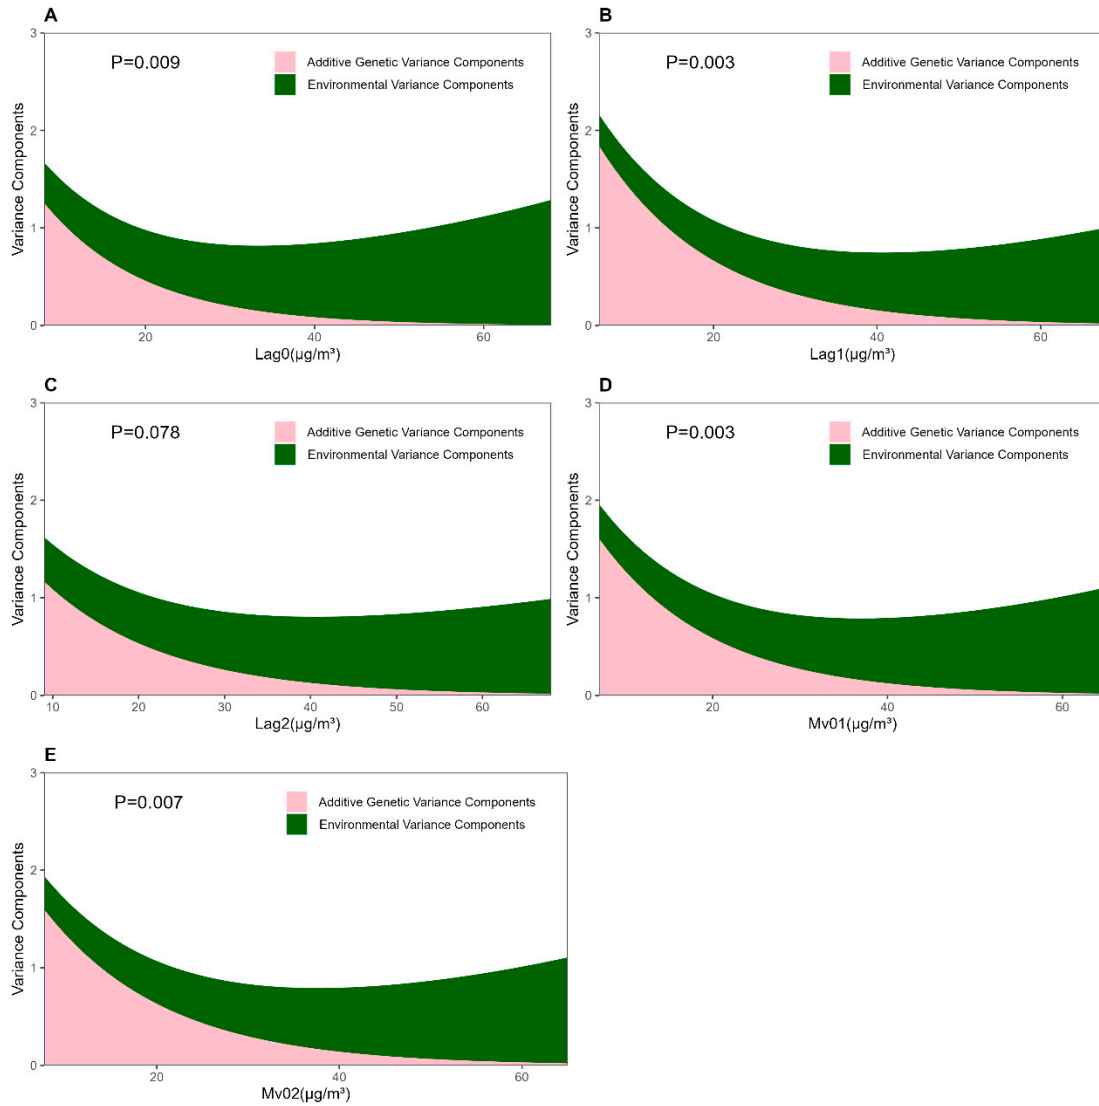

**Figure S3. Interactions of genotype by  $\text{NO}_2$  on FPG in different lag structures.** In all lag structures, environmental effects on FPG increased with increasing  $\text{NO}_2$  concentrations, while genetic effects diminished gradually. Lag0, concentrations of the day of investigation; Lag1, concentrations of the previous day of investigation; Lag2, concentrations of the two days before the investigation; Mv01, moving average concentrations of Lag0 and Lag1; Mv02, moving average concentrations of Lag0 to Lag2.
